# Supplementary material for: Examining Job Satisfaction Levels of Student Assistant Employees of Akron Summit County Public Libraries: A Survey.
Source: PLOS journal article supplement (doi:10.1371/journal.pcbi.0010063), 1996-04-01
Supplement: S1 (10.1371/journal.pcbi.0010063.s001) [file journal.pcbi.0010063.s001]

**Supporting Information**

Figure S1. Taxonomic distribution of Stealth in bacteria.

Pseudotree of all bacteria with known Stealth status. The taxonomy-based tree includes as leaves all species and strains for which there is a completely sequenced genome or positive evidence of a *stealth* gene. Strains containing Stealth are marked in red.

--|-------------Corynebacterium diphtheriae NCTC 13129

| | | | | |-Corynebacterium efficiens YS-314

| | | | | |-Corynebacterium glutamicum ATCC 13032

| | | | | |-Corynebacterium jeikeium K411

| | | | |-----------Mycobacterium avium subsp. paratuberculosis str. k10

| | | | | |-**Mycobacterium leprae TN**

| | | | | |---**Mycobacterium bovis AF2122/97**

| | | | | |-**Mycobacterium tuberculosis CDC1551**

| | | | | |-**Mycobacterium tuberculosis H37Rv**

| | | | |-----**Nocardia farcinica IFM 10152**

| | | |-------Kineococcus radiotolerans SRS30216

| | | |-------Brevibacterium linens BL2

| | | | |-----Tropheryma whipplei str. Twist

| | | | | |-Tropheryma whipplei TW08/27

| | | | |---------Leifsonia xyli subsp. xyli str. CTCB07

| | | | |-----**Arthrobacter sp.**

| | | |-------**Nocardioides sp.**

| | | | |-----Propionibacterium acnes KPA171202

| | | |-------Streptomyces avermitilis MA-4680

| | | | |-**Streptomyces coelicolor A3(2)**

| | | |-------Thermobifida fusca YX

| | |-------Bifidobacterium longum DJO10A

| | |-Bifidobacterium longum NCC2705

| |-----------Rubrobacter xylanophilus DSM 9941

| |-----Symbiobacterium thermophilum IAM 14863

|-----------Aquifex aeolicus VF5

|-------------Bacteroides fragilis NCTC 9343

| | | | |-Bacteroides fragilis YCH46

| | | | |-Bacteroides thetaiotaomicron VPI-5482

| | | |-----Porphyromonas gingivalis W83

| | |---------Cytophaga hutchinsonii

| |-------------Chlorobium tepidum TLS

|-------------Chlamydia muridarum Nigg

| | | |-Chlamydia trachomatis D/UW-3/CX

| | |---Chlamydophila abortus S26/3

| | |-Chlamydophila caviae GPIC

| | |-Chlamydophila pneumoniae AR39

| | |-Chlamydophila pneumoniae CWL029

| | |-Chlamydophila pneumoniae J138

| | |-Chlamydophila pneumoniae TW-183

| |-----Parachlamydia sp. UWE25

|-----------Chloroflexus aurantiacus

| |-----Dehalococcoides ethenogenes 195

| |-Dehalococcoides sp. CBDB1

|-------Crocosphaera watsonii WH 8501

| | |---Synechococcus elongatus PCC 6301

| | | |-Synechococcus elongatus PCC 7942

| | | |-Synechococcus sp. WH 8102

| | |---Synechocystis sp. PCC 6803

| | |---Thermosynechococcus elongatus BP-1

| |-------Gloeobacter violaceus PCC 7421

| |-------Anabaena variabilis ATCC 29413

| | |---Nostoc punctiforme PCC 73102

| | |-Nostoc sp. PCC 7120

| |-----Trichodesmium erythraeum IMS101

| |-------Prochlorococcus marinus str. MIT 9313

| |-Prochlorococcus marinus str. NATL2A

| |-----Prochlorococcus marinus subsp. marinus str. CCMP1375

| |---Prochlorococcus marinus subsp. pastoris str. CCMP1986

|-----------Deinococcus radiodurans R1

| |-------Thermus thermophilus HB27

| |-Thermus thermophilus HB8

|-----------Pasteuria nishizawae str. North American

| | | |-------Bacillus anthracis str. A1055

| | | | | | |-Bacillus anthracis str. A2012

| | | | | | |-Bacillus anthracis str. Ames

| | | | | | |-Bacillus anthracis str. 'Ames Ancestor'

| | | | | | |-Bacillus anthracis str. Australia 94

| | | | | | |-Bacillus anthracis str. CNEVA-9066

| | | | | | |-Bacillus anthracis str. Kruger B

| | | | | | |-Bacillus anthracis str. Sterne

| | | | | | |-Bacillus anthracis str. Vollum

| | | | | | |-Bacillus anthracis str. Western North America USA6153

| | | | | | |-Bacillus cereus ATCC 10987

| | | | | | |-Bacillus cereus ATCC 14579

| | | | | | |-Bacillus cereus E33L

| | | | | | |-Bacillus cereus G9241

| | | | | | |-----Bacillus thuringiensis serovar konkukian str. 97-27

| | | | | |-Bacillus clausii KSM-K16

| | | | | |-Bacillus halodurans C-125

| | | | | |-Bacillus licheniformis ATCC 14580

| | | | | |-----Bacillus subtilis subsp. subtilis str. 168

| | | | |---Exiguobacterium sp. 255-15

| | | | |---Geobacillus kaustophilus HTA426

| | | | |---Oceanobacillus iheyensis HTE831

| | | |-----Listeria innocua Clip11262

| | | | |-Listeria monocytogenes EGD-e

| | | | |-Listeria monocytogenes str. 1/2a F6854

| | | | |-Listeria monocytogenes str. 4b F2365

| | | | |-Listeria monocytogenes str. 4b H7858

| | | |---------Staphylococcus aureus subsp. aureus COL

| | | | |-Staphylococcus aureus subsp. aureus MRSA252

| | | | |-Staphylococcus aureus subsp. aureus MSSA476

| | | | |-Staphylococcus aureus subsp. aureus Mu50

| | | | |-Staphylococcus aureus subsp. aureus MW2

| | | | |-Staphylococcus aureus subsp. aureus N315

| | | |-Staphylococcus epidermidis ATCC 12228

| | | |-Staphylococcus epidermidis RP62A

| | | |-Staphylococcus haemolyticus JCSC1435

| | | |-----Staphylococcus saprophyticus subsp. saprophyticus ATCC 15305

| | |-------Enterococcus faecalis V583

| | | |-Enterococcus faecium

| | |-----Lactobacillus acidophilus NCFM

| | | | |-Lactobacillus casei ATCC 334

| | | | |-----Lactobacillus delbrueckii subsp. bulgaricus ATCC BAA-365

| | | | |-Lactobacillus gasseri

| | | | |-Lactobacillus johnsonii NCC 533

| | | | |-**Lactobacillus plantarum WCFS1**

| | | |---**Pediococcus pentosaceus ATCC 25745**

| | |---------Leuconostoc mesenteroides subsp. mesenteroides ATCC 8293

| | | |---**Oenococcus oeni PSU-1**

| | |---------Lactococcus lactis subsp. cremoris SK11

| | | |---Lactococcus lactis subsp. lactis Il1403

| | |-------Streptococcus agalactiae NEM316

| | | |---Streptococcus agalactiae 2603V/R

| | |-**Streptococcus gordonii 38**

| | |-**Streptococcus mitis NCTC 12261**

| | |-Streptococcus mutans UA159

| | |-**Streptococcus oralis (unknown strain)**

| | |-Streptococcus pneumoniae R6

| | |-Streptococcus pneumoniae TIGR4

| | |-**Streptococcus pneumoniae 546/62**

| | |-**Streptococcus pneumoniae 34365**

| | |-**Streptococcus pneumoniae Sutcliff**

| | |-**Streptococcus pneumoniae Colemore**

| | |-**Streptococcus pneumoniae Johnson**

| | |-----Streptococcus pyogenes MGAS8232

| | | |---Streptococcus pyogenes M1 GAS

| | | | |-Streptococcus pyogenes MGAS5005

| | | |---Streptococcus pyogenes MGAS6180

| | | |---Streptococcus pyogenes MGAS315

| | | | |-Streptococcus pyogenes SSI-1

| | | |---Streptococcus pyogenes M49 591

| | | |---Streptococcus pyogenes MGAS10394

| | |-**Streptococcus sobrinus 6715**

| | |-Streptococcus suis 89/1591

| | |-Streptococcus thermophilus CNRZ1066

| | |-Streptococcus thermophilus LMD-9

| | |-**Streptococcus thermophilus LMG 18311**

| | |-**Streptococcus thermophilus NCFB 2393**

| | |-Streptococcus thermophilus (unknown strain)

| |---------Clostridium acetobutylicum ATCC 824

| | | | |-Clostridium perfringens str. 13

| | | | |-Clostridium tetani E88

| | | | |-Clostridium thermocellum ATCC 27405

| | | |-----Desulfitobacterium hafniense

| | |---------Moorella thermoacetica ATCC 39073

| | |---Thermoanaerobacter tengcongensis MB4

| |-------------Onion yellows phytoplasma OY-M

| |-------Mesoplasma florum L1

| |-------Mycoplasma gallisepticum R

| | |-Mycoplasma genitalium G-37

| | |-Mycoplasma hyopneumoniae 232

| | |-Mycoplasma hyopneumoniae 7448

| | |-Mycoplasma hyopneumoniae J

| | |-Mycoplasma mobile 163K

| | |-------Mycoplasma mycoides subsp. mycoides SC str. PG1

| | |-Mycoplasma penetrans HF-2

| | |-Mycoplasma pneumoniae M129

| | |-Mycoplasma pulmonis UAB CTIP

| | |-Mycoplasma synoviae 53

| |-------Ureaplasma parvum serovar 3 str. ATCC 700970

|---------------Fusobacterium nucleatum subsp. nucleatum ATCC 25586

| |---Fusobacterium nucleatum subsp. vincentii ATCC 49256

|-----------Rhodopirellula baltica SH 1

|-------------Caulobacter crescentus CB15

| | |-------Bartonella henselae str. Houston-1

| | | | |-Bartonella quintana str. Toulouse

| | | |-----Bradyrhizobium japonicum USDA 110

| | | | |---Rhodopseudomonas palustris CGA009

| | | |-----Brucella melitensis 16M

| | | | |-------Brucella abortus biovar 1 str. 9-941

| | | | |---Brucella suis 1330

| | | |-----Mesorhizobium loti MAFF303099

| | | | |-Mesorhizobium sp. BNC1

| | | |-------Agrobacterium tumefaciens str. C58

| | | |-----Sinorhizobium meliloti 1021

| | |-------**Rhodobacter sphaeroides 36983**

| | | |---Silicibacter pomeroyi DSS-3

| | | |-Silicibacter sp. TM1040

| | |-------Gluconobacter oxydans 621H

| | | |-----Magnetospirillum magnetotacticum

| | | |---Rhodospirillum rubrum

| | |-------Anaplasma marginale str. St. Maries

| | | | |-----Ehrlichia canis str. Jake

| | | | |-Ehrlichia ruminantium str. Gardel

| | | | |-Ehrlichia ruminantium str. Welgevonden

| | | |---------Rickettsia akari str. Hartford

| | | | | | |-Rickettsia conorii str. Malish 7

| | | | | | |-Rickettsia felis URRWXCal2

| | | | | | |-Rickettsia rickettsii

| | | | | | |---Rickettsia sibirica 246

| | | | | |---Rickettsia prowazekii str. Madrid E

| | | | | |-Rickettsia typhi str. Wilmington

| | | | |-------Wolbachia endosymbiont strain TRS of Brugia malayi

| | | | |-Wolbachia endosymbiont of Drosophila ananassae

| | | | |-Wolbachia endosymbiont of Drosophila melanogaster

| | | | |-Wolbachia endosymbiont of Drosophila simulans

| | | |-------Candidatus Pelagibacter ubique HTCC1062

| | |-------Erythrobacter litoralis HTCC2594

| | |-----Novosphingobium aromaticivorans DSM 12444

| | |-------Zymomonas mobilis subsp. mobilis ZM4

| |---------Bordetella bronchiseptica RB50

| | | | |-Bordetella parapertussis 12822

| | | | |-Bordetella pertussis Tohama I

| | | |-----Burkholderia fungorum LB400

| | | | | |-Burkholderia mallei ATCC 23344

| | | | | |---Burkholderia pseudomallei K96243

| | | | |-----Ralstonia metallidurans CH34

| | | | | |---Ralstonia eutropha JMP134

| | | | |---Ralstonia solanacearum GMI1000

| | | |-----Polaromonas sp. JS666

| | | |-------Rubrivivax gelatinosus PM1

| | |-------Thiobacillus denitrificans ATCC 25259

| | |-------Methylobacillus flagellatus KT

| | |---------Chromobacterium violaceum ATCC 12472

| | | |---Neisseria gonorrhoeae FA 1090

| | | |-----**Neisseria meningitidis (A) Z2491 (M2677, M4775, M1124, F8229)**

| | | |---Neisseria meningitidis (B) MC58

| | | |---**Neisseria meningitidis (B) (unknown strain)**

| | | |---**Neisseria meningitidis (L) (unknown strain)**

| | | |---**Neisseria meningitidis (X) M7575**

| | |-------Nitrosomonas europaea ATCC 19718

| | |-------Azoarcus sp. EbN1

| | |---Dechloromonas aromatica RCB

| |-----------Bdellovibrio bacteriovorus HD100

| | | |-------Desulfotalea psychrophila LSv54

| | | |-------Desulfovibrio desulfuricans G20

| | | | |-----Desulfovibrio vulgaris subsp. vulgaris str. Hildenborough

| | | |-------Geobacter metallireducens

| | | |-Geobacter sulfurreducens PCA

| | |---------Campylobacter coli RM2228

| | | |-Campylobacter jejuni RM1221

| | | |-----Campylobacter jejuni subsp. jejuni NCTC 11168

| | | |-Campylobacter lari RM2100

| | | |-Campylobacter upsaliensis RM3195

| | |-----Helicobacter hepaticus ATCC 51449

| | | |-Helicobacter pylori 26695

| | | |-Helicobacter pylori J99

| | |---Wolinella succinogenes DSM 1740

| |---------**Aeromonas hydrophila PPD 11/90, JCM3983**

| | |-------**Saccharophagus degradans 14642**

| | |-------Saccharophagus degradans 2-40

| | | |-----Colwellia psychrerythraea 34H

| | | |-----Idiomarina loihiensis L2TR

| | | |-----Shewanella oneidensis MR-1

| | |-----------Buchnera aphidicola str. APS (Acyrthosiphon pisum)

| | | | |---Buchnera aphidicola str. Bp (Baizongia pistaciae)

| | | | |---Buchnera aphidicola str. Sg (Schizaphis graminum)

| | | |---Escherichia coli CFT073

| | | | |-Escherichia coli K12

| | | | |-Escherichia coli O157:H7

| | | | |-Escherichia coli O157:H7 EDL933

| | | |-----Erwinia carotovora subsp. atroseptica SCRI1043

| | | |-------Photorhabdus luminescens subsp. laumondii TTO1

| | | |-------Salmonella enterica subsp. enterica serovar Choleraesuis

| | | | | |---Salmonella enterica subsp. enterica serovar Typhi str. CT18

| | | | | |-Salmonella enterica subsp. enterica serovar Typhi Ty2

| | | | |-Salmonella typhimurium LT2

| | | |-------Shigella flexneri 2a str. 2457T

| | | | |-Shigella flexneri 2a str. 301

| | | |-------Candidatus Blochmannia floridanus

| | | | |-----Candidatus Blochmannia pennsylvanicus str. BPEN

| | | |---Wigglesworthia glossinidia endosymbiont of Glossina brevipalpis

| | | |---Yersinia pestis biovar Medievalis str. 91001

| | | |-Yersinia pestis CO92

| | | |-Yersinia pestis KIM

| | | |-Yersinia pseudotuberculosis IP 32953

| | |-------Coxiella burnetii RSA 493

| | | |-----Legionella pneumophila str. Lens

| | | |-Legionella pneumophila str. Paris

| | | |-----Legionella pneumophila subsp. pneumophila str. Philadelphia 1

| | |-------Methylococcus capsulatus str. Bath

| | |-------Actinobacillus pleuropneumoniae

| | | | | |---Actinobacillus pleuropneumoniae serovar 1 str. 4074

| | | | | |---**Actinobacillus pleuropneumoniae serovar 12 str. 8329**

| | | | |-**Actinobacillus suis SO4**

| | | |---Haemophilus ducreyi 35000HP

| | | | |-Haemophilus influenzae 86-028NP

| | | | |-Haemophilus influenzae R2846

| | | | |-Haemophilus influenzae R2866

| | | | |-Haemophilus influenzae (d) Rd KW20

| | | | |-**Haemophilus influenzae (f) 700222**

| | | |-----Haemophilus somnus 129PT

| | | | |-Haemophilus somnus 2336

| | | |---Mannheimia succiniciproducens MBEL55E

| | | |-------Pasteurella multocida subsp. multocida str. Pm70

| | |-------Acinetobacter sp. ADP1

| | | | |---Psychrobacter arcticum 273-4

| | | |-------Azotobacter vinelandii

| | | |-----Pseudomonas aeruginosa PAO1

| | | | |-Pseudomonas aeruginosa UCBPP-PA14

| | | |---Pseudomonas fluorescens Pf-5

| | | | |-Pseudomonas fluorescens PfO-1

| | | |---Pseudomonas putida KT2440

| | | |---------Pseudomonas syringae pv. syringae B728a

| | | |-------Pseudomonas syringae pv. phaseolicola 1448A

| | | |-----Pseudomonas syringae pv. tomato str. DC3000

| | |-----------Francisella tularensis subsp. tularensis SCHU S4

| | |-------Photobacterium profundum SS9

| | | |---------Vibrio cholerae O1 biovar eltor str. N16961

| | | |-Vibrio fischeri ES114

| | | |-Vibrio parahaemolyticus RIMD 2210633

| | | |-Vibrio vulnificus CMCP6

| | | |-Vibrio vulnificus YJ016

| | |-----------Xanthomonas axonopodis pv. citri str. 306

| | | |-----Xanthomonas campestris pv. campestris str. 8004

| | | | |-Xanthomonas campestris pv. campestris str. ATCC 33913

| | | |-----Xanthomonas oryzae pv. oryzae KACC10331

| | |---Xylella fastidiosa 9a5c

| | |-Xylella fastidiosa Ann-1

| | |-Xylella fastidiosa Dixon

| | |-Xylella fastidiosa Temecula1

| |-----Magnetococcus sp. MC-1

|---------------Leptospira interrogans serovar Copenhageni str. Fiocruz L1-130

| | |---Leptospira interrogans serovar Lai str. 56601

| |-------Borrelia burgdorferi B31

| | |-Borrelia garinii PBi

| |---Treponema denticola ATCC 35405

| |-----Treponema pallidum subsp. pallidum str. Nichols

|-----------Thermotoga maritima MSB8
